# Supplementary material for: Characterization of meiotic recombination intermediates through gene knockouts in founder hybrid mice
Source: Genome Res. 2023 Nov;33(11):2018–27. doi: 10.1101/gr.278024.123 (PMC10760447; doi:10.1101/gr.278024.123)
Supplement: Supplement 6 [file Supplemental_Table_S1.xlsx]

## Sheet: Sheet1
Founder ID	Genetic background	sgRNAs	Sex	5' site alleles	3' site alelles	In cis deletion
3.1a	B6CASTF1	A+D	M	-11 / +196	WT
3.1b	B6CASTF1	A+D	M	-1 / -2	WT
3.1c	B6CASTF1	A+D	M	+1	WT
3.1d	B6CASTF1	A+D	F	-11	WT
3.1e	B6CASTF1	A+D	F	+1	WT	+
3.1f	B6CASTF1	A+D	F	+1/-11	WT
4.1a	B6CASTF1	A+D	M	WT	WT
4.1b	B6CASTF1	A+D	M	-1 / -3	WT
4.1c	B6CASTF1	A+D	F	-11/WT	WT
4.1d	B6CASTF1	A+D	F	+1/-2	WT
4.1e	B6CASTF1	A+D	F	+1	WT	+
8.1a	B6CASTF1	A+F	M	+1	-12	+
8.1b	B6CASTF1	A+F	F	-	-
8.1c	B6CASTF1	A+F	F	-	-12
9.1a	B6CASTF1	A+F	M	+1	n.d.	+
9.1b	B6CASTF1	A+F	M	+1/-2	n.d.
9.1d	B6CASTF1	A+F	F	+1/+5	n.d.
10.1a	B6CASTF1	A+F	M	-1	-12
Supplementary Table S1. Genotyping and sequencing information of the founder mice
n.d. : not determined
