# Supplementary material for: Characterization of meiotic recombination intermediates through gene knockouts in founder hybrid mice
Source: Genome Res. 2023 Nov;33(11):2018–27. doi: 10.1101/gr.278024.123 (PMC10760447; doi:10.1101/gr.278024.123)
Supplement: Supplement 7 [file Supplemental_Table_S2.xlsx]

## Sheet: Sheet1
Founder ID	Genetic background	sgRNAs	Sex	5' site alleles	3' site alelles	In cis deletion	Normalized testes weight	Caudal Sperm count (x106)	% normal synapsis (autosomal)	Zygotene with DMC1 foci
17.1a	C57BL/6J	A+F	M	-	-		2.81	0	0	-
17.1b	C57BL/6J	A+F	M	-	-		2.5	0	0	-
17.1c	C57BL/6J	A+F	M	+1	n.d.	+	2.53	0	0	-
17.1d	C57BL/6J	A+F	M	+1	-134 bp	+	2.81	0	0	-
17.1e	C57BL/6J	A+F	M	-94 / -1	+1	+	2.68	0	0	-
17.1f	C57BL/6J	A+F	M	+1	+2	+	2.45	0	0	-
18.1a	C57BL/6J	A+F	M	-32	n.d.	+	n.d.	n.d.	n.d.	n.d.
18.1b	C57BL/6J	A+F	M	+1/-5	-344		n.d.	n.d.	n.d.	n.d.
18.1c	C57BL/6J	A+F	M	-	-	+	n.d.	n.d.	n.d.	n.d.
18.1d	C57BL/6J	A+F	M	+1	+2		n.d.	n.d.	n.d.	n.d.
18.1e	C57BL/6J	A+F	M	+1/-12	+1	+	n.d.	n.d.	n.d.	n.d.
18.1f	C57BL/6J	A+F	M	-	-	+	n.d.	n.d.	n.d.	n.d.
WT-B6	C57BL/6J	-	M	WT	WT		8.77 ± 0.83	21.74 ± 3.06	94.8 ± 4.7	+
Supplementary Table S2. Genotyping, sequencing information and fertility parameters of the C57BL/6J founder mice generated with sgRNAs-A and -F
n.d. : not determined, - no amplification
