# Supplementary material for: Characterization of meiotic recombination intermediates through gene knockouts in founder hybrid mice
Source: Genome Res. 2023 Nov;33(11):2018–27. doi: 10.1101/gr.278024.123 (PMC10760447; doi:10.1101/gr.278024.123)
Supplement: Supplement 8 [file Supplemental_Table_S3.xlsx]

## Sheet: Sheet1
Genetic background	Transfer ID	sgRNAs	DOB	Embryos transferred	Pups born	Male	Female	Male IDs	Mutants	% mutants	Mosaics
CASTB6F1	TGMZ3	A + D	2019-06-04	24	6	3	3	3.1a-c	3	1	1
CASTB6F1	TGMZ4	A + D	2019-06-04	23	5	2	3	4.1a-b	1	0.5	0
CASTB6F1	TGMZ5	A + D	Not pregnant	23	0	-	-
CASTB6F1	TGMZ6	A + 3F	Not pregnant	18	0	-	-
CASTB6F1	TGMZ8	A + 3F	2019-09-25	25	3	1	2	8.1a	1	1	0
CASTB6F1	TGMZ9	A + 3F	2019-11-26	30	4	2	1	9.1a-b	2	1	0
CASTB6F1	TGMZ10	A + 3F	2019-12-09	31	1	1	0	10.1a	1	1	0
C57BL/6J	TGMZ16	A + 3F	2021-11-29	28	10	7	3	16.1a-g	7	1	0
C57BL/6J	TGMZ17	A + 3F	2021-11-29	28	11	6	5	17.1a-f	6	1	0
C57BL/6J	TGMZ18	A + 3F	2021-11-29	29	13	7	6	18.1a-f	7	1	0
C57BL/6J	TGMZ19	A + 3F	2021-11-29	29	13	7	6	19.1a-f	7	1	0
Supplementary Table S3. Production details of founder mice
