# Supplementary material for: Characterization of meiotic recombination intermediates through gene knockouts in founder hybrid mice
Source: Genome Res. 2023 Nov;33(11):2018–27. doi: 10.1101/gr.278024.123 (PMC10760447; doi:10.1101/gr.278024.123)
Supplement: Supplement 9 [file Supplemental_Table_S4.xlsx]

## Sheet: Sheet1
Name	Target site (5'-3')	PAM
sgRNA-A	GTTTTCAGTAAATTACTAGG	AGG
sgRNA-B	AGGAGGTGGCATTGAAAGTA	TGG
sgRNA-C	AATTTCACAGAATTTCGTAC	TGG
sgRNA-D	CAGCTGTCTCATACCCTCTG	TGG
sgRNA-F	CCAGGAACAGGCGGCTACTC	AGG
Supplementary Table S4A. CRISPR target sites used
Primer name	Primer sequence (5'-3')	Spans the cut site for sgRNA
Dmc1-F1	AACAGAGTCCCCTTGCCTCT	A, B
Dmc1-R1	AGCTTGGAATGATCCTGCAT	A, B
Dmc1-F2	CCTTGAGGGTCTCAGCACAG	C, D
Dmc1-R2	ACAGGACTGACAACACGACC	C, D
Dmc1-F3	CACTGGGTGTAGCTTGAGCA	F
Dmc1-R3	CTCAGAGATCAGCTTGCCCC	F
Supplementary Table S4B. Primer sequences used for genotyping
Dataset	Reference	Accession number
RPA and RAD51 ChIP-seq data in Dmc1-/- hybrid mice	This study	GEO: GSE239997
RPA and RAD51 ChIP-seq data in WT hybrid mice	(Hinch et al. 2020)	GEO: GSE143582
DMC1 ChIP-seq data in WT hybrid mice	(Hinch et al. 2019)	GEO: GSE124991
H3K4me3 ChIP-seq data in WT hybrid mice	(Li et al. 2019)	GEO: GSE119727
SPO11-oligo data	(Lange et al. 2016)	GEO: GSE84689
DMC1 ChIP-seq data in Hop2-/- mice	(Khil et al. 2012)	GEO: GSE34592
Supplementary Table S4C. Datasets used in this work
