# Supplementary material for: Characterization of meiotic recombination intermediates through gene knockouts in founder hybrid mice
Source: Genome Res. 2023 Nov;33(11):2018–27. doi: 10.1101/gr.278024.123 (PMC10760447; doi:10.1101/gr.278024.123)
Supplement: Supplement 10 [file Supplemental_Table_S5.xlsx]

## Sheet: Sheet1
	RAD51	RPA
Number of reads	149027766	44132246
Percentage of reads mapped to reference (mm10)	0.86	0.91
Number of ssDNA (Type 1) reads identified	30704029	12292142
Number of ssDNA (Type 1) reads inferred to be unique	12164981	9073899
Number of hotspots called de novo	9023	13348
Supplemental Table S5. Details of SSDS maps. Key metrics for the SSDS maps generated following ChIP-seq for RPA and RAD51 in adult mouse testes.
