# Supplementary material for: Characterization of meiotic recombination intermediates through gene knockouts in founder hybrid mice
Source: HighWire-hosted journal article supplement (doi:10.1101/gr.278024.123), 2023-11-01
Supplement: Supplemental_Fig_S1.pdf [file Supplemental_Fig_S1.pdf]

**A**

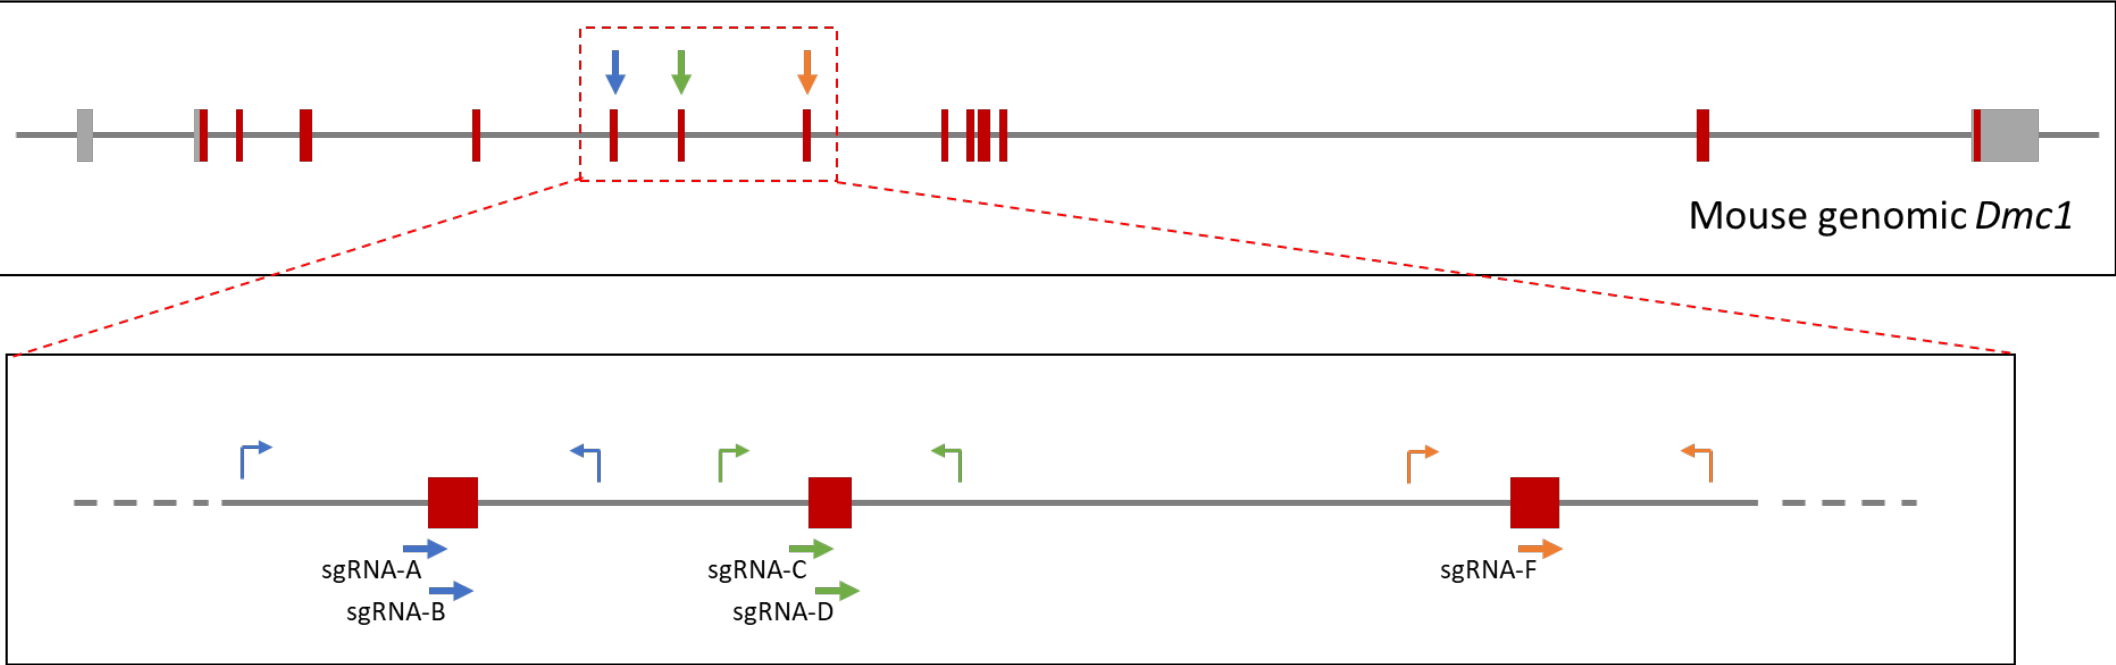

**B**

| sgRNA   | Target sequence (5'-3')   | Exon to be targeted | In vitro cutting efficiency (TIDE) |
|---------|---------------------------|---------------------|------------------------------------|
| sgRNA-A | GTTTTTCAGTAAATTACTAGG AGG | 6                   | 81%                                |
| sgRNA-B | AGGAGGTGGCATTGAAAGTA TGG  | 6                   | 8%                                 |
| sgRNA-C | AATTCACAGAATTCGTAC TGG    | 7                   | 1%                                 |
| sgRNA-D | CAGCTGTCTCATACCCTCTG TGG  | 7                   | 25%                                |
| control | GATGGTGATGGTGCGCCAGG AGG  | N/A                 | 62%                                |

**C**

| sgRNA   | Target sequence (5'-3')  | Exon to be targeted | In vitro cutting efficiency (TIDE) |
|---------|--------------------------|---------------------|------------------------------------|
| sgRNA-F | CCAGGAACAGGCGGCTACTC AGG | 8                   | 89%                                |
| control | GATGGTGATGGTGCGCCAGG AGG | N/A                 | 64%                                |

**Supplementary Figure S1.** Production details for generation of hybrid *Dmc1*<sup>-/-</sup> mice. (A) Genomic structure of the *Dmc1* gene showing the positions of the sgRNAs. (B)(C) Sequences and in vitro cutting efficiencies of the selected sgRNAs.
