# Supplementary material for: Characterization of meiotic recombination intermediates through gene knockouts in founder hybrid mice
Source: HighWire-hosted journal article supplement (doi:10.1101/gr.278024.123), 2023-11-01
Supplement: Supplemental_Fig_S4.pdf [file Supplemental_Fig_S4.pdf]

A

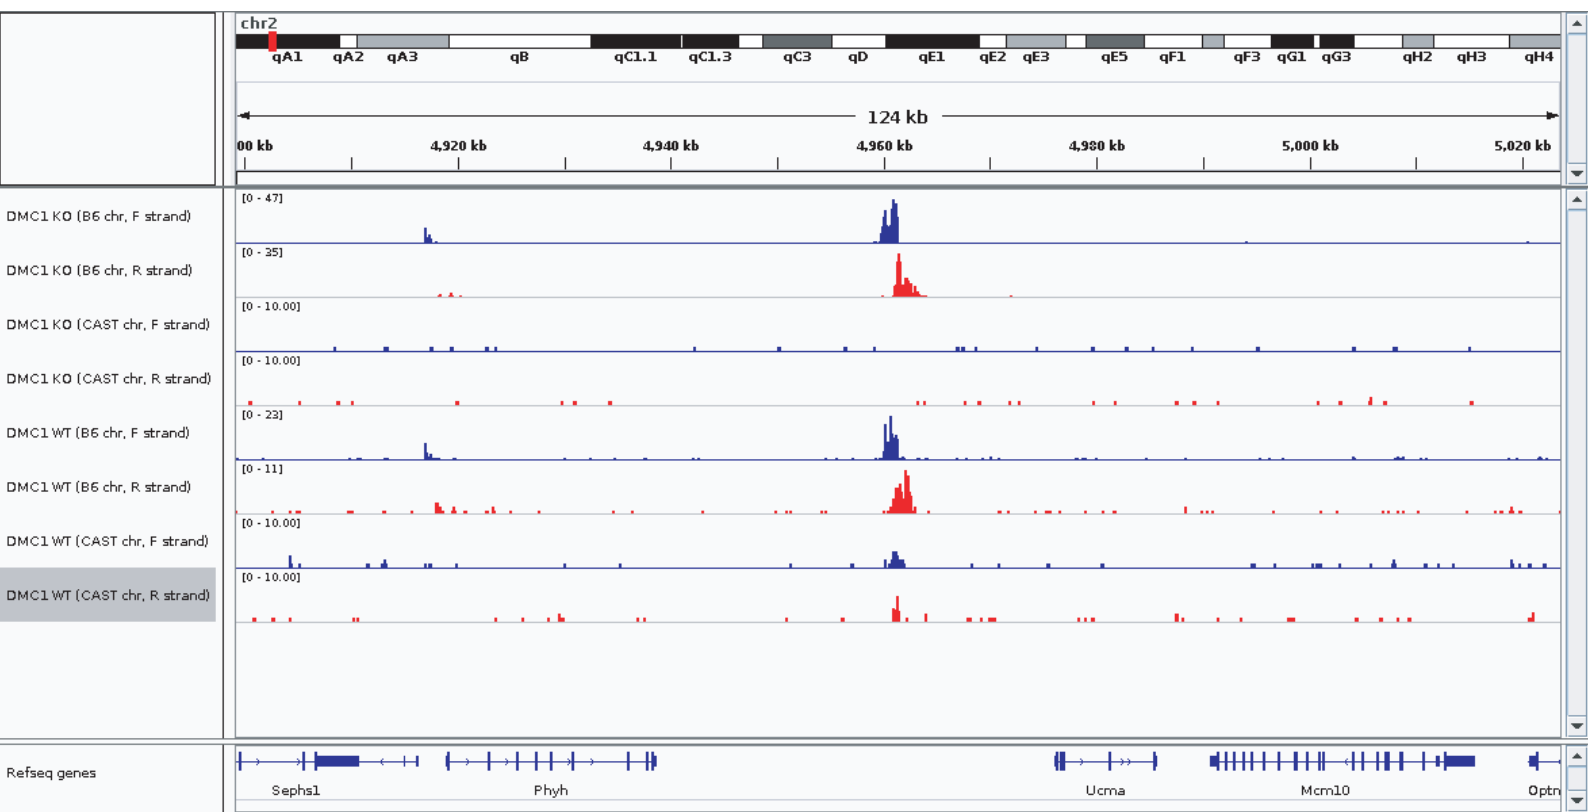

B

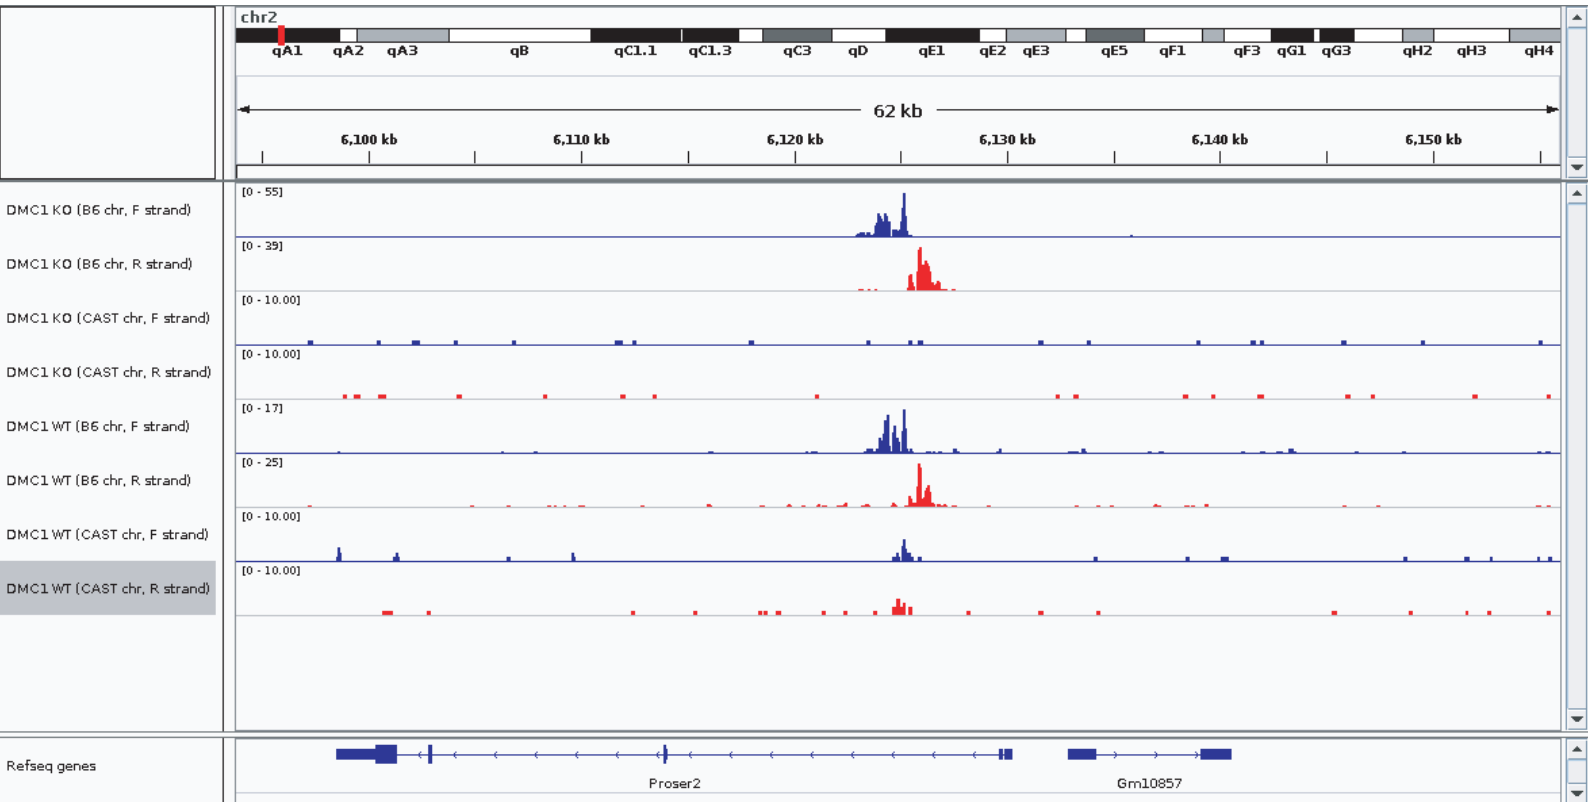

**Supplementary Figure S4.** Integrative Genomics Viewer (IGV) plots illustrating RPA ChIP-seq read-depth in two hotspots (A, B). The top four tracks show depth of forward and reverse strand reads mapping to the B6 chromosome and CAST chromosomes respectively in *Dmc1*<sup>-/-</sup> (KO) mice. The bottom four tracks show the corresponding values assayed in *Dmc1*<sup>+/+</sup> (WT) mice. Both hotspots are activated by the PRDM9 CAST allele, which binds the B6 chromosome more strongly in these hotspots. Note that the B6 chromosome has RPA signal in both *Dmc1*<sup>-/-</sup> and *Dmc1*<sup>+/+</sup> mice, while the CAST chromosome has signal only in *Dmc1*<sup>+/+</sup> mice.
